# Supplementary material for: Assessing the impact of including variation in general population mortality on standard errors of relative survival and loss in life expectancy
Source: PubMed Central journal article supplement (PMC9059421; doi:10.1186/s12874-022-01597-7), 2022-05-02
Supplement: 12874_2022_1597_MOESM2_ESM.pdf [file 12874_2022_1597_MOESM2_ESM.pdf]

| Method                              | Setting / scenario <sup>b</sup> | 5-year Relative Survival (RS) |       |       |       | Loss in life expectancy (LLE) <sup>a,g</sup> |       |      |      |       |       |
|-------------------------------------|---------------------------------|-------------------------------|-------|-------|-------|----------------------------------------------|-------|------|------|-------|-------|
|                                     |                                 | PE                            | SE    | LCI   | UCI   | RP <sup>c</sup>                              | PE    | SE   | LCI  | UCI   | RP    |
| <i>men, 55 years at diagnosis</i>   |                                 |                               |       |       |       |                                              |       |      |      |       |       |
| Conventional <sup>d</sup>           | 2S <sup>f</sup>                 | 0.637                         | 0.103 | 0.404 | 0.800 | 0.00                                         | 11.52 | 3.12 | 5.40 | 17.64 | 0.00  |
| Bootstrap-based <sup>e</sup>        | J                               | 0.637                         | 0.102 | 0.404 | 0.800 | -0.01                                        | 11.52 | 3.14 | 5.37 | 17.68 | 1.03  |
| <i>men, 65 years at diagnosis</i>   |                                 |                               |       |       |       |                                              |       |      |      |       |       |
| Conventional                        | 2S                              | 0.668                         | 0.072 | 0.505 | 0.788 | 0.00                                         | 7.59  | 1.52 | 4.61 | 10.57 | 0.00  |
| Bootstrap-based                     | J                               | 0.668                         | 0.072 | 0.505 | 0.788 | 0.00                                         | 7.60  | 1.55 | 4.57 | 10.63 | 3.44  |
| <i>men, 75 years at diagnosis</i>   |                                 |                               |       |       |       |                                              |       |      |      |       |       |
| Conventional                        | 2S                              | 0.509                         | 0.074 | 0.356 | 0.643 | 0.00                                         | 5.81  | 0.73 | 4.39 | 7.24  | 0.00  |
| Bootstrap                           | J                               | 0.509                         | 0.074 | 0.356 | 0.643 | 0.00                                         | 5.83  | 0.78 | 4.30 | 7.36  | 14.84 |
| <i>men, 85 years at diagnosis</i>   |                                 |                               |       |       |       |                                              |       |      |      |       |       |
| Conventional                        | 2S                              | 0.612                         | 0.100 | 0.389 | 0.774 | 0.00                                         | 1.77  | 0.44 | 0.91 | 2.63  | 0.00  |
| Bootstrap-based                     | J                               | 0.612                         | 0.100 | 0.389 | 0.774 | 0.01                                         | 1.78  | 0.46 | 0.89 | 2.67  | 8.59  |
| <i>women, 55 years at diagnosis</i> |                                 |                               |       |       |       |                                              |       |      |      |       |       |
| Conventional                        | 2S                              | 0.673                         | 0.098 | 0.443 | 0.825 | 0.00                                         | 8.87  | 2.90 | 3.18 | 14.56 | 0.00  |
| Bootstrap-based                     | J                               | 0.673                         | 0.098 | 0.443 | 0.825 | -0.01                                        | 8.87  | 2.91 | 3.17 | 14.57 | 0.36  |
| <i>women, 65 years at diagnosis</i> |                                 |                               |       |       |       |                                              |       |      |      |       |       |
| Conventional                        | 2S                              | 0.702                         | 0.060 | 0.567 | 0.802 | 0.00                                         | 6.47  | 1.47 | 3.59 | 9.35  | 0.00  |
| Bootstrap-based                     | J                               | 0.702                         | 0.060 | 0.567 | 0.802 | 0.00                                         | 6.47  | 1.48 | 3.57 | 9.37  | 1.40  |
| <i>women, 75 years at diagnosis</i> |                                 |                               |       |       |       |                                              |       |      |      |       |       |
| Conventional                        | 2S                              | 0.553                         | 0.082 | 0.380 | 0.695 | 0.00                                         | 5.88  | 1.05 | 3.83 | 7.93  | 0.00  |
| Bootstrap-based                     | J                               | 0.553                         | 0.082 | 0.380 | 0.695 | 0.00                                         | 5.88  | 1.07 | 3.78 | 7.98  | 4.50  |
| <i>women, 85 years at diagnosis</i> |                                 |                               |       |       |       |                                              |       |      |      |       |       |
| Conventional                        | 2S                              | 0.649                         | 0.081 | 0.467 | 0.783 | 0.00                                         | 1.89  | 0.45 | 1.00 | 2.78  | 0.00  |
| Bootstrap-based                     | J                               | 0.649                         | 0.081 | 0.467 | 0.783 | 0.00                                         | 1.89  | 0.46 | 0.98 | 2.80  | 4.22  |

<sup>a</sup> LLE is presented in years.

<sup>b</sup> See Table 1 for information on the different settings and scenarios.

<sup>c</sup> RP is presented in %.

<sup>d</sup> Conventional refers to the standard method for estimating SEs, where the general population mortality is assumed to be measured without uncertainty.

<sup>e</sup> Bootstrap-based refers to the parametric bootstrap approach used for including uncertainty in observed population mortality rates in the estimation of SEs.

<sup>f</sup> S stands for small and refers to the setting to investigate what would be observed for a smaller population.

<sup>g</sup> LLE estimates in setting 2S and scenario J are presented for the Gotland region

Table S2: Point estimates (PE) of 5-year relative survival (RS) and loss in life expectancy (LLE), with lower (LCI) and upper (UCI) confidence intervals, standard errors (SE) and relative % precision (RP) from setting 2S, scenario J and different methods for including uncertainty in the general population mortality when estimating SEs. Results are presented for men and women, aged 55, 65, 75 and 85 years at diagnosis and the LLE are for the Gotland region. General population mortality rates are stratified by age, sex, calendar year and region. RP illustrates comparison of the conventional method to a bootstrap-based method.
